# Supplementary material for: Methods for the Inclusion of Real-World Evidence in a Rare Events Meta-Analysis of Randomized Controlled Trials
Source: MDPI journal article supplement (doi:10.3390/jcm12041690), 2023-02-20
Supplement: s1 [file s1]

## **R code for the methods included this study**

### **Please install the following packages first**

```
install.packages(c("rstan"))
```

y and y\_se represent the vector of effect and standard error, respectively. J denotes the number of studies included in a meta-analysis.

### **The naïve data synthesis**

```
data {  
  int<lower=1> J;  
  real y[J];  
  real<lower=0> y_se[J];  
}  
  
parameters {  
  real theta;           // relative treatment effect (log OR)  
  real<lower=0> tau;     // the heterogeneity parameter  
}  
  
model  
{  
  //prior distributions  
  tau ~ normal (0, 0.5);  
  theta ~ normal (0,2.82);  
  //likelihood  
  For (i in 1:J)  
  {  
    orl[i]~normal (theta, y_se[i]+tau);}  
  }  
}
```

### **The design-adjusted synthesis**

```
data {  
  int<lower=1> J;  
  real y[J];  
  int<lower=0, upper=1> group[J]; // the study type variable, where 0 represents the RCTs and  
                                   // 1 represents the RWE studies.  
  real<lower=0> y_se[J];  
  int<lower=1> R; // the number of RWE studies  
}
```

```

parameters {
  real<lower=0,upper=1> w[R];    //the variance inflation factor
  real theta;
  real<lower=0> tau;
}

model {
  //prior distributions
  theta~ normal(0, 2.82);
  tau ~ normal(0, 0.5);
  w ~ beta(0.25,1);    // w ~ beta(0.25,1), w ~ beta(1.5,1), w ~ beta(4,1) indicate that we placed
  a low, medium, and higher level confidence in RWE studies, respectively.
  //likelihood
  for( i in 1:J)
    {if (group[i]==0) or1[i]~normal(theta,orse[i]+tau ); //0 denote RCT
      else    or1[i]~normal(theta,orse[i]/q[i-R]+tau); }
}

```

### **The using real-world evidence as prior information**

```

data {
  int<lower=1> M;    // the number of RCTs
  real y_rct [M];    // the effect in RCTs
  real<lower=0> y_se_rct[M];    //the standard error in RCTs
  real mu;    //the estimated effect of the RWE studies
  real se_rwe;    //the standard error of the estimated effect of the RWE studies
}

```

```

parameters {
  real theta;
  real<lower=0> tau;
  real<lower=0,upper=1> w;    // the variance inflation factor
}

```

```

transformed parameters {
  real s= se_rwe/sqrt(w);
}

```

```

model {
  //prior distributions
  theta~ normal(mu, s);
  tau ~ normal(0, 0.5);
  w ~ beta(0.25,1); // w ~ beta(0.25,1), w ~ beta(1.5,1), w ~ beta(4,1) indicate that we placed a
  low, medium, and higher level confidence in RWE studies, respectively.
  //likelihood

```

```

for( i in 1:M)
  { y_rct[i]~normal(theta, y_se_rct[i]+tau); } }

```

### The three-level hierarchical models

```

data {
  int<lower=1> J;
  int<lower=0, upper=1> group[J];
  vector[J] y;
  vector[J] y_se;
}
parameters {
  vector [2] theta_design;
  real theta;
  real<lower=0> tau;
  real<lower=0> tau_rct;
  real<lower=0> tau_rwe;
  real<lower=0,upper=1> w;
}
model {
  //prior distributions
  vector[J] y_hat;
  theta ~ normal(0, 2.82);
  tau ~ normal(0, 0.5);
  tau_rct ~ normal(0, 0.5);
  tau_rwe ~ normal(0, 0.5);
  for (i in 1:J) y_hat[i] = theta_design[group[i]];
  theta_design ~ normal (theta, tau);
  w ~ beta(0.25,1); // w ~ beta(0.25,1), w ~ beta(1.5,1), w ~ beta(4,1) indicate that we placed a
  low, medium, and higher level confidence in RWE studies, respectively.
  //likelihood
  for (i in 1:J){
    if (group[i]==0) {y[i] ~ normal(y_hat[i], tau_rct+y_se[j]);} else {
      y[i] ~ normal(y_hat[i], tau_rwe /w+y_se[i]);}
    }
  }
}

```
